# Supplementary material for: Fracture toughness and critical thickness of β-(InxGa1−x)2O3/Ga2O3 by first principles
Source: Royal Society of Chemistry journal article supplement (doi:10.1039/d3tc03010e), 2023-12-21
Supplement: d3tc03010e1.pdf [file d3tc03010e1.pdf]

## Supplementary Material

### Fracture Toughness and Critical Thickness of $\beta$ -( $\text{In}_x\text{Ga}_{1-x}$ ) $_2\text{O}_3$ / $\text{Ga}_2\text{O}_3$ by First Principles

Jiahe Cao<sup>1,a</sup>, Zhigao Xie<sup>1</sup>, Yan Wang<sup>1</sup>, Hanzhao Song<sup>1</sup>, Guosong Zeng<sup>2</sup>, Weihua Tang<sup>3</sup> and Chee-  
Keong Tan<sup>1,4,5,6,b</sup>

<sup>1</sup>Advanced Materials Thrust, Function Hub, Hong Kong University of Science and Technology (Guangzhou), Nansha, Guangzhou  
511466, China

<sup>2</sup>Department of Mechanical and Energy Engineering, Southern University of Science and Technology, Shenzhen 518055, China

<sup>3</sup>Innovation Center of Gallium Oxide Semiconductor (IC-GAO), College of Integrated Circuit Science and Engineering, Nanjing  
University of Posts and Telecommunications, Nanjing 210023, China

<sup>4</sup>Department of Electronic and Computer Engineering, Hong Kong University of Science and Technology, Hong Kong, China

<sup>5</sup>Guangzhou Municipal Key Laboratory of Materials Informatics, The Hong Kong University of Science and Technology  
(Guangzhou), Guangzhou, Guangdong 511453, China

<sup>6</sup>Guangzhou Municipal Key Laboratory of Integrated Circuits Design, The Hong Kong University of Science and Technology  
(Guangzhou), Guangzhou, Guangdong 511453, China

<sup>a</sup>Email : [jcao492@connect.hkust-gz.edu.cn](mailto:jcao492@connect.hkust-gz.edu.cn) , <sup>b</sup>Email : [cheekeongtan@hkust-gz.edu.cn](mailto:cheekeongtan@hkust-gz.edu.cn); [cheekeongtan@ust.hk](mailto:cheekeongtan@ust.hk)

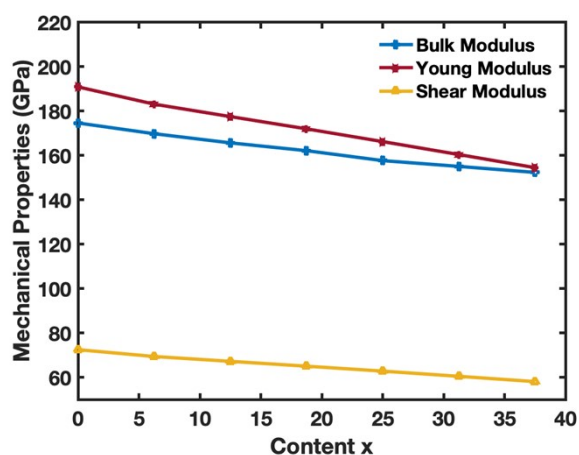

Supplementary Fig. 1. Mechanical properties of  $\text{Ga}_2\text{O}_3$  and  $(\text{In}_x\text{Ga}_{1-x})_2\text{O}_3$  with In concentration up to 37.5%. Blue line represents bulk modulus, red line represents Young's modulus and yellow line represents shear modulus.

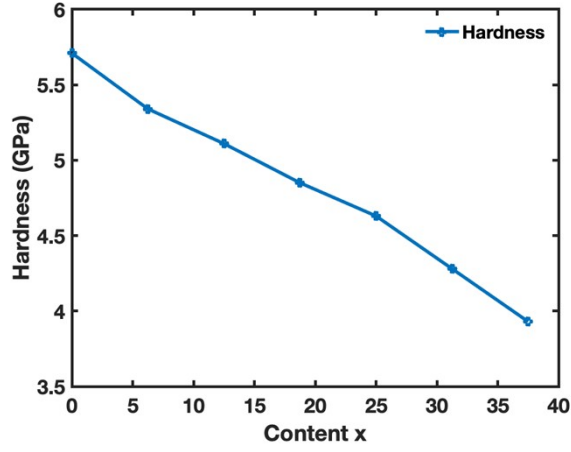

Supplementary Fig. 2. Hardness of  $\text{Ga}_2\text{O}_3$  and  $(\text{In}_x\text{Ga}_{1-x})_2\text{O}_3$  with In concentration up to 37.5%.

Table I: Poisson's Ratio of  $\text{Ga}_2\text{O}_3$  and  $(\text{In}_x\text{Ga}_{1-x})_2\text{O}_3$  with In concentration up to 37.5%.

| In Content      | 0.00% | 6.25% | 12.50% | 18.75% | 25.00% | 31.25% | 37.50% |
|-----------------|-------|-------|--------|--------|--------|--------|--------|
| Poisson's Ratio | 0.32  | 0.32  | 0.32   | 0.32   | 0.32   | 0.33   | 0.33   |

The in-plane and out-of-plane strain for [010] orientation:

$$\epsilon_{xx} = \frac{a_s}{a_f} - 1$$

$$\epsilon_{zz} = \frac{c_s \sin \beta_s}{c_f \sin \beta_f} - 1$$

$$\epsilon_{xz} = \frac{(a_f - a_s) \cos \beta_f}{2a_f \sin \beta_f} + \frac{c_s \cos \beta_s - c_f \cos \beta_f}{2c_f \sin \beta_f} = \frac{1}{2} \left( \frac{c_s \sin \beta_s}{c_f \sin \beta_f} - \frac{a_s}{a_f} \cot \beta_f \right)$$

For the surface conditions  $\sigma_{yy} = \sigma_2 = 0$  and  $\sigma_4 = \sigma_6 = 0$ ,  $\epsilon_{xy} = \epsilon_{yz} = 0$  and

$$\epsilon_{yy} = - \frac{C_{12} \epsilon_{xx} + C_{23} \epsilon_{zz} + 2C_{25} \epsilon_{xz}}{C_{22}}$$

The in-plane and out-of-plane strain for [100] orientation:

$$\epsilon'_{xx} = \frac{c_s}{c_f} - 1$$

$$\epsilon'_{yy} = \epsilon_{yy} = \frac{b_s}{b_f} - 1$$

Angle  $\theta$  is the angle of (100) plane against z-direction.

$$\epsilon'_{xx} = \epsilon'_{xx} \cos^2 \theta + \epsilon'_{zz} \sin^2 \theta - 2\epsilon'_{xz} \cos \theta \sin \theta$$

$$\epsilon'_{zz} = \epsilon'_{xx} \sin^2 \theta + \epsilon'_{zz} \cos^2 \theta - \epsilon'_{xz} \sin 2\theta$$

$$\epsilon'_{xz} = (\epsilon'_{xx} - \epsilon'_{zz}) \cos \theta \sin \theta + \epsilon'_{xz} \cos 2\theta$$
